# Supplementary material
Source: Springer Nature journal article supplement (https://www.springermedizin.de/resource/supplementary/40478_2013_15_MOESM5_ESM.pdf/25657964)

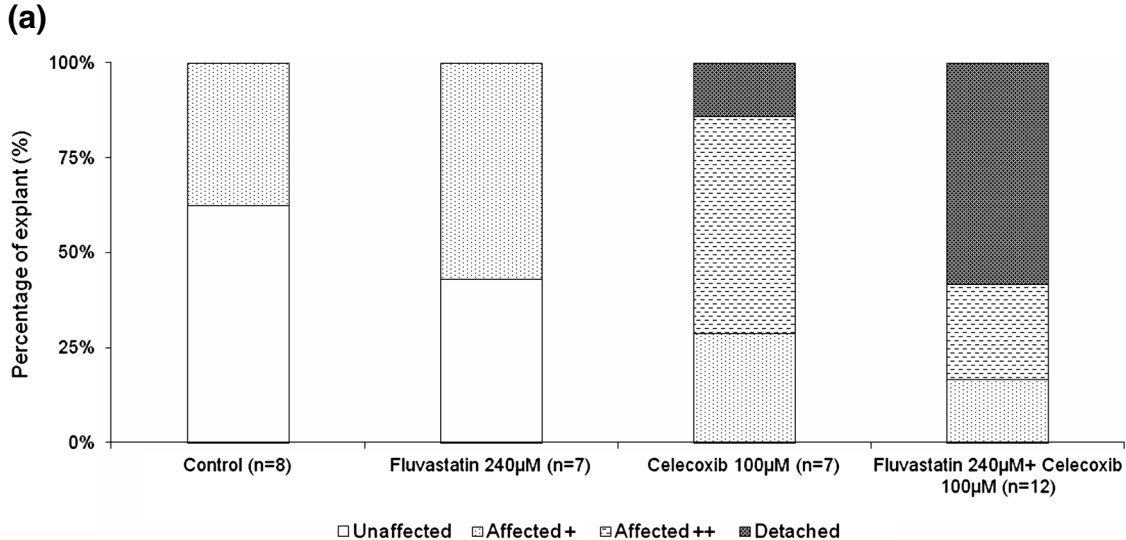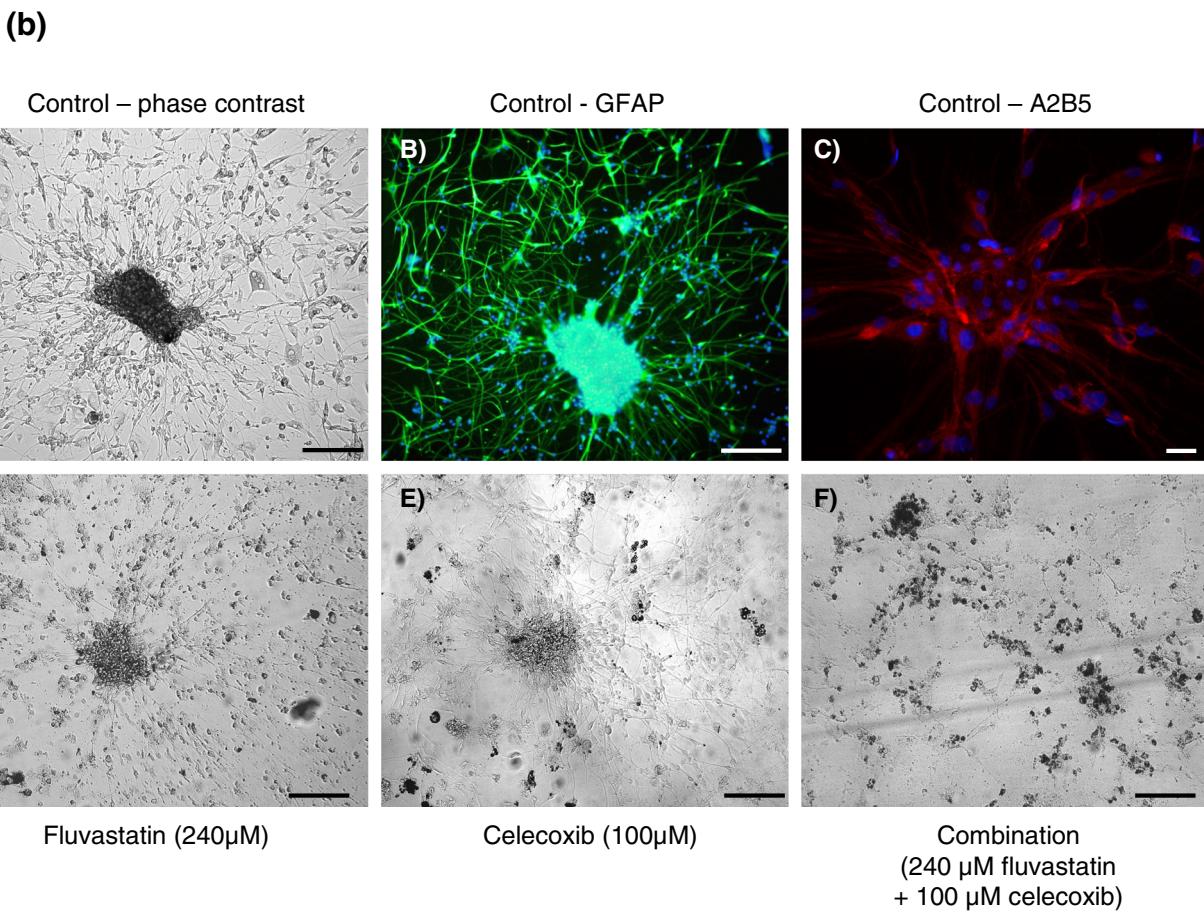

Supplement: MOESM5 [file 25657964]
